# Supplementary material for: An endoplasmic reticulum-targeting fluorescent probe for the imaging of GSH in living cells
Source: Royal Society of Chemistry journal article supplement (doi:10.1039/c9ay01191a), 2019-01-01
Supplement: c9ay01191a1.pdf [file c9ay01191a1.pdf]

**Electronic Supplementary data for**

**An endoplasmic reticulum-targeting fluorescent probe for the imaging of GSH in  
living cells**

Cheng-Shi Jiang, Zhi-Qiang Cheng, Yong-Xi Ge, Jia-Li Song, Juan Zhang\*, Hua  
Zhang\*

*School of Biological Science and Technology, University of Jinan, Jinan 250022,  
China*

\*Corresponding authors

E-mail addresses: bio\_zhangj@ujn.edu.cn (J. Zhang), bio\_zhangh@ujn.edu.cn (H.  
Zhang)

Tel: 0086-531-89736199, Fax: 0086-531-89736818

## Materials and Instruments

All solvents and reagents were commercially available and used without further purification unless for special needs. Twice-distilled water was used in all the experiments. Reactions were monitored by TLC using Yantai Jingyou (China) GF254 silica gel plates. Silica gel column chromatography was performed on silica gel (200–300 mesh) from Qingdao Hailang (China) and on a Biotage Isolera One (Biotage, Uppsala, Sweden). The fluorescence spectra and relative fluorescence intensity were measured with an Agilent Cary Eclipse (Varian, Palo Alto, California USA). UV/vis spectra were made with a Shimadzu UV-2600 spectrophotometer. High-resolution ESIMS data were acquired on an Agilent 6520 Q-TOF LC/MS.  $^1\text{H}$  and  $^{13}\text{C}$  NMR spectra were recorded on Bruker Avance III 600 MHz NMR Spectrometer. Chemical shifts were expressed in  $d$  (ppm) and coupling constants ( $J$ ) in Hz with residual solvent signals as references ( $\text{CDCl}_3$ ,  $d_{\text{H}}$  7.26 ppm and  $d_{\text{C}}$  77.0 ppm;  $\text{DMSO-}d_6$ ,  $d_{\text{H}}$  2.50 ppm and  $d_{\text{C}}$  39.5 ppm). Cells imaging was performed with a Nikon A1R confocal microscope.

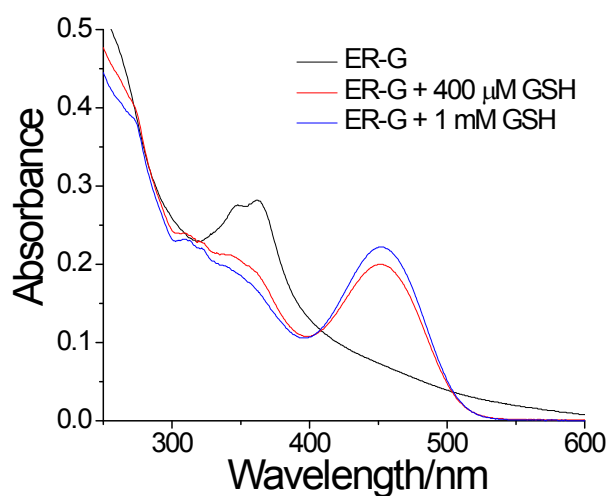

**Fig. S1** UV-Vis absorption spectra of 5  $\mu\text{M}$  ER-G in absence and presence of GSH in PBS (20 mM, 5% methanol, pH = 7.4)

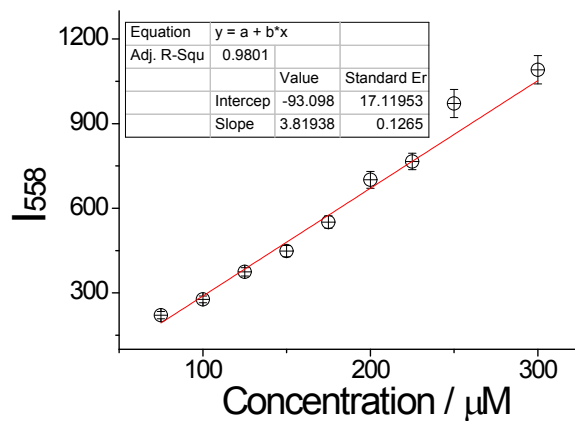

**Fig. S2** Linearity between the fluorescence intensity at 558 nm and GSH concentration in the range of 75-300  $\mu\text{M}$ .

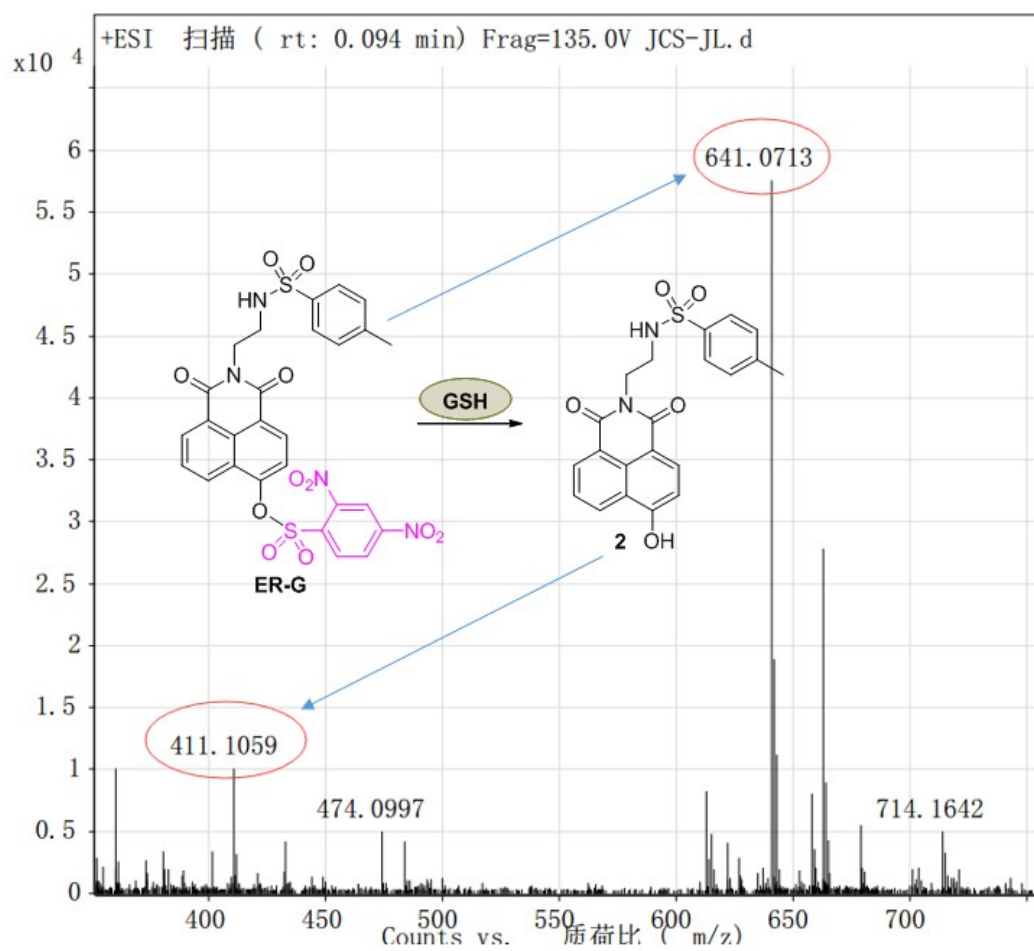

**Fig. S3** HRMS (ESI) assay of the reaction products of ER-G with GSH.

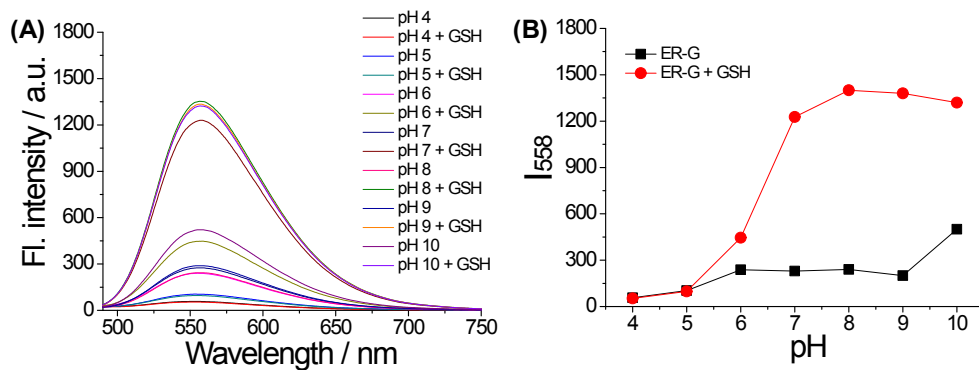

**Fig. S4** (A) Fluorescence spectra of 5  $\mu\text{M}$  **ER-G** in absence and presence of 400  $\mu\text{M}$  GSH at various pH values. (B) Fluorescence intensity at 558 nm of 5  $\mu\text{M}$  **ER-G** in absence and presence of 400  $\mu\text{M}$  GSH at various pH values.  $\lambda_{\text{ex}} = 470$  nm.

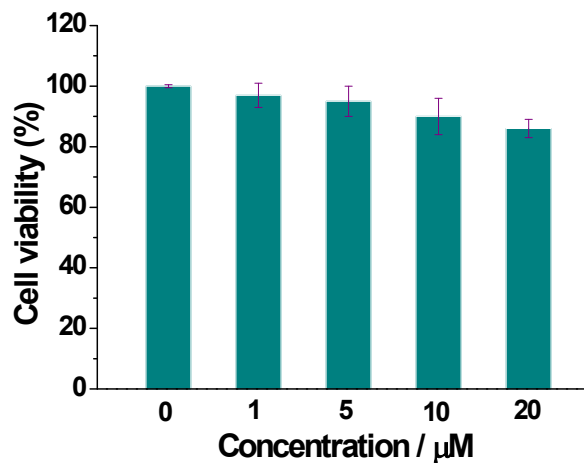

**Fig. S5** Survivability of HepG2 cells after treatment with 1, 5, 10 and 20  $\mu\text{M}$  **ER-G**.

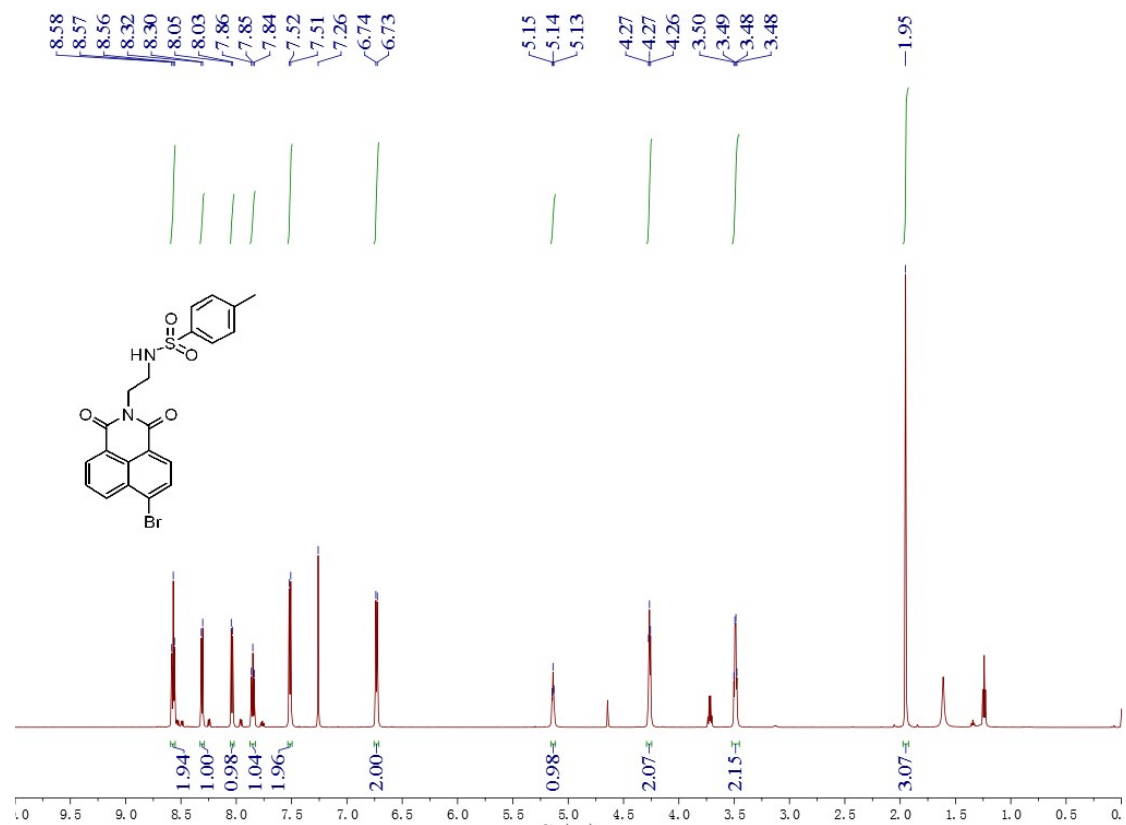

Fig. S6 <sup>1</sup>H NMR spectrum of compound 1

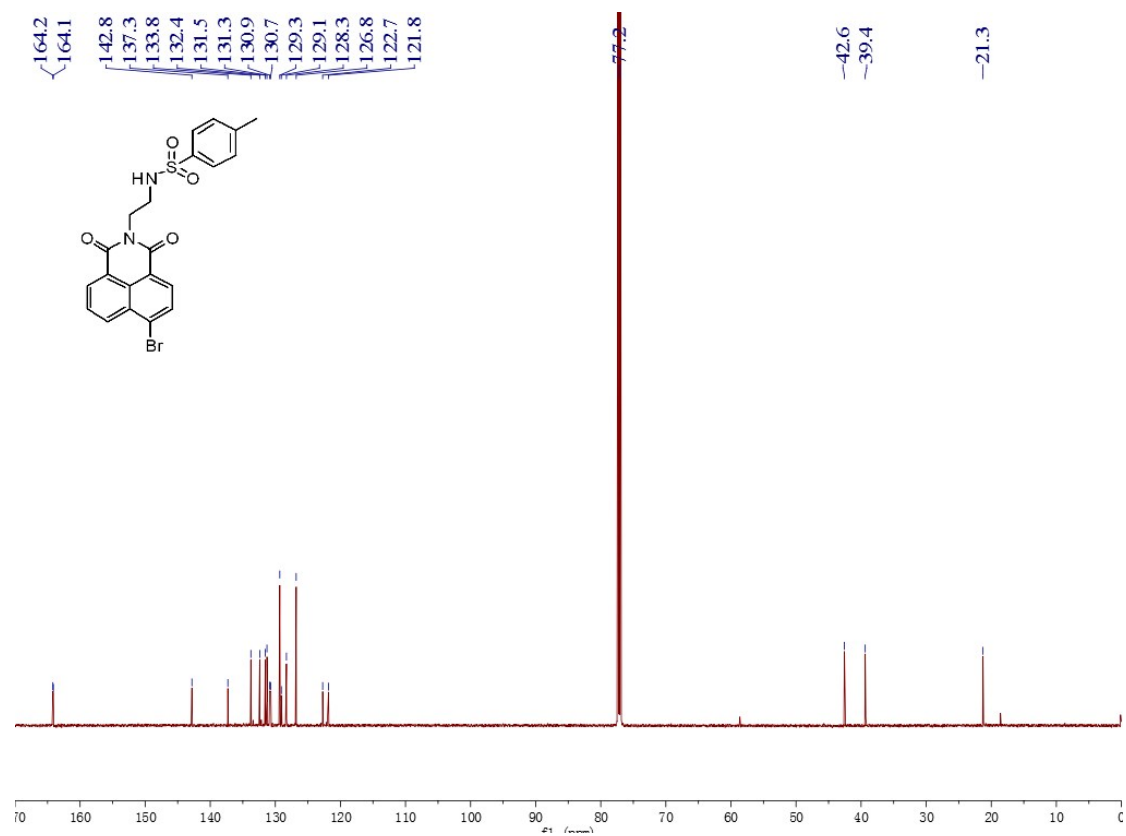

Fig. S7 <sup>13</sup>C NMR spectrum of compound 1

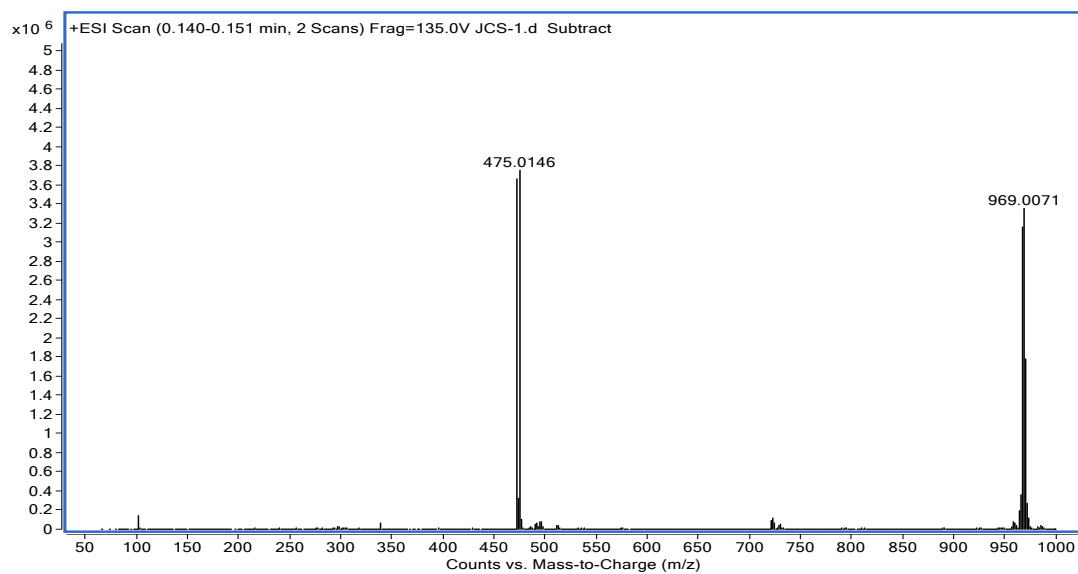

**Fig. S8** HRESIMS spectrum of compound **1**

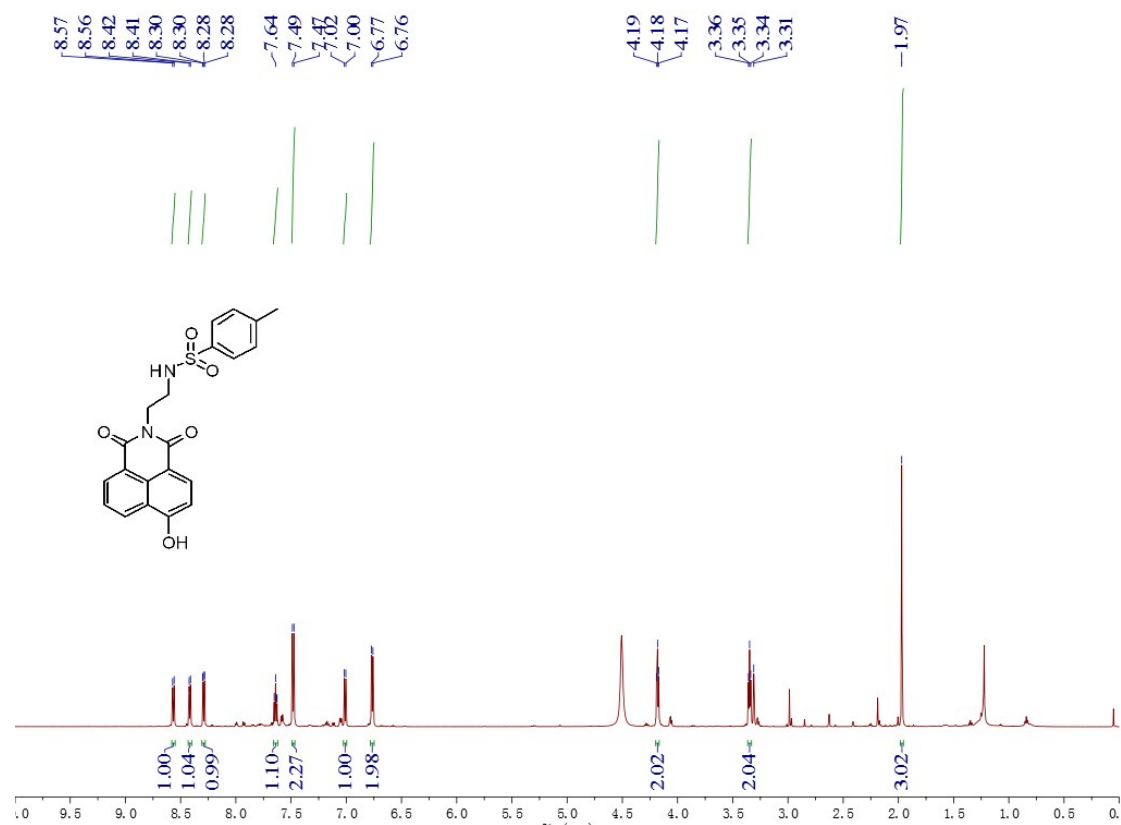

**Fig. S9** <sup>1</sup>H NMR spectrum of compound 2

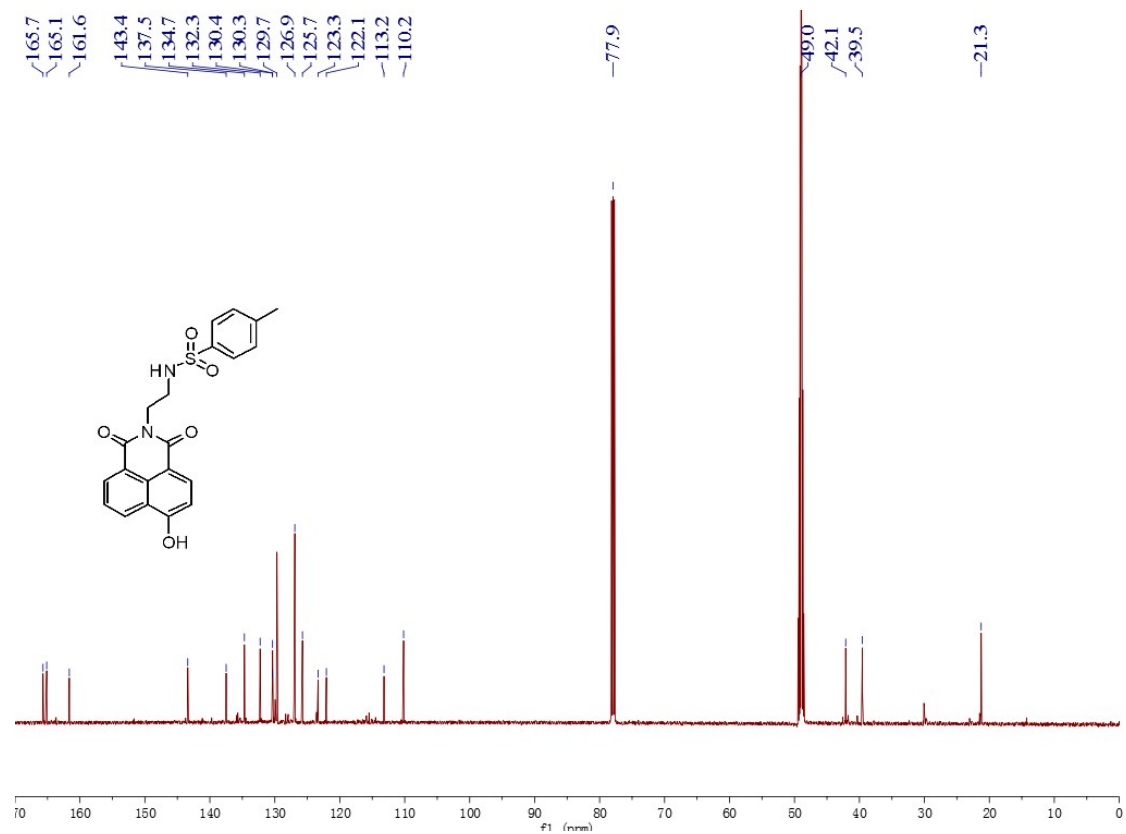

**Fig. S10** <sup>13</sup>C NMR spectrum of compound 2

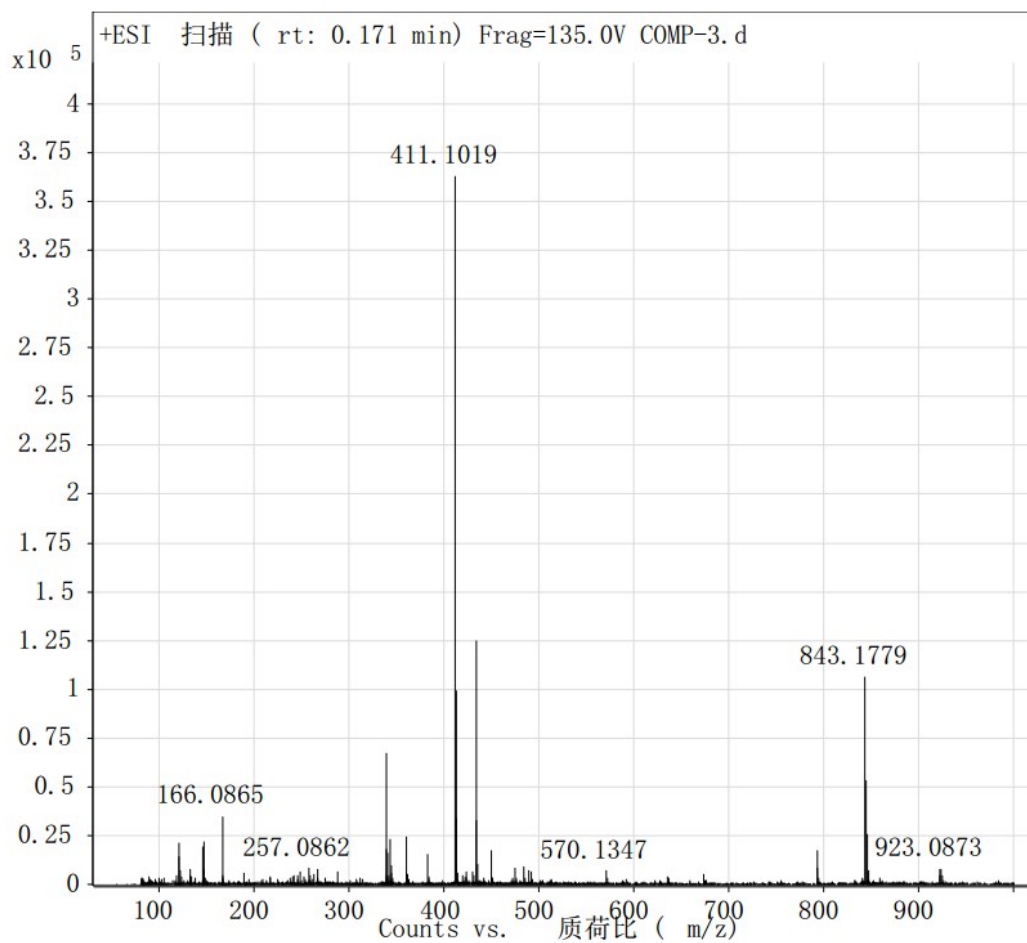

**Fig. S11** HRESIMS spectrum of compound **2**



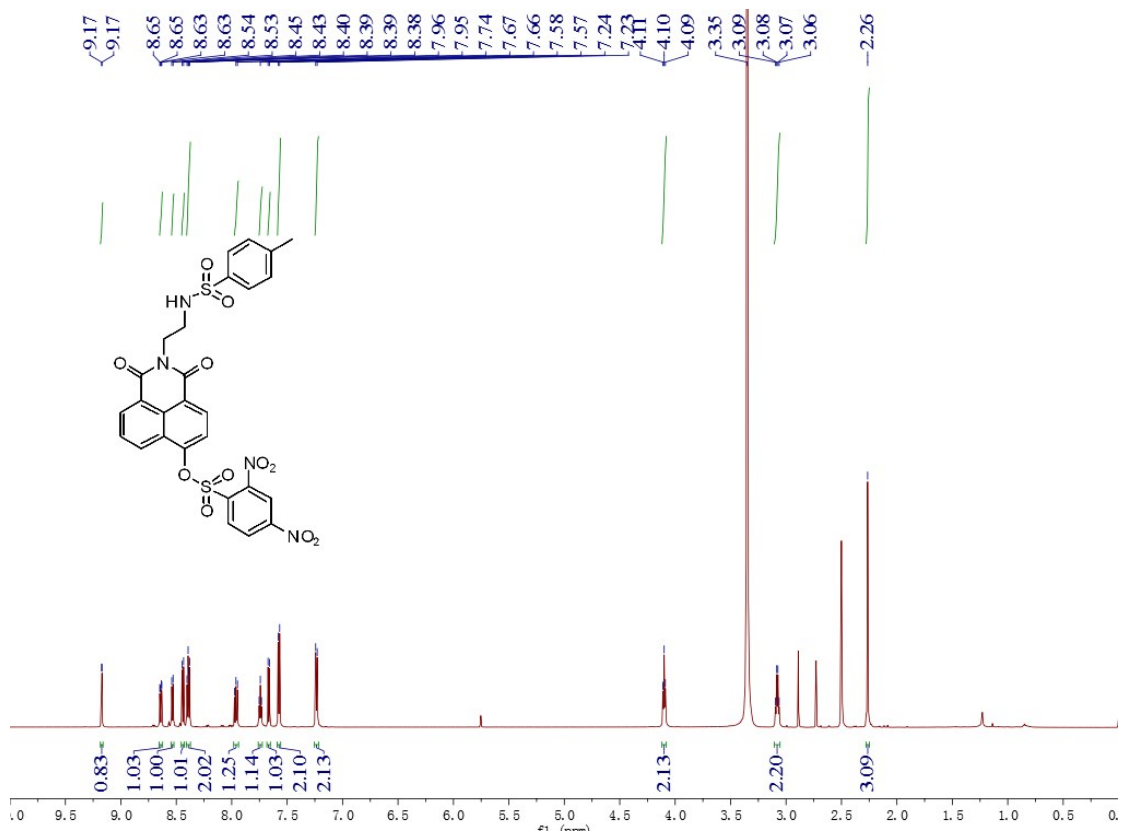

Fig. S12 <sup>1</sup>H NMR spectrum of compound ER-G

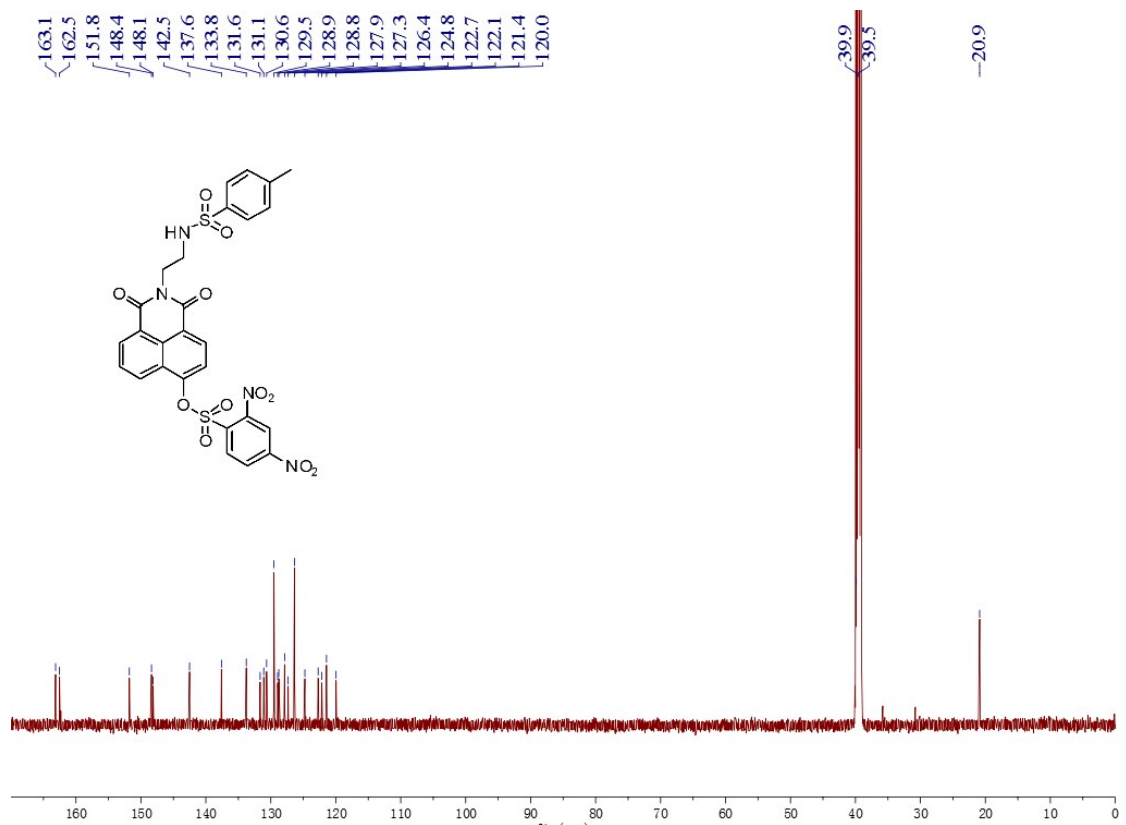

**Fig. S13**  $^{13}\text{C}$  NMR spectrum of compound **ER-G**

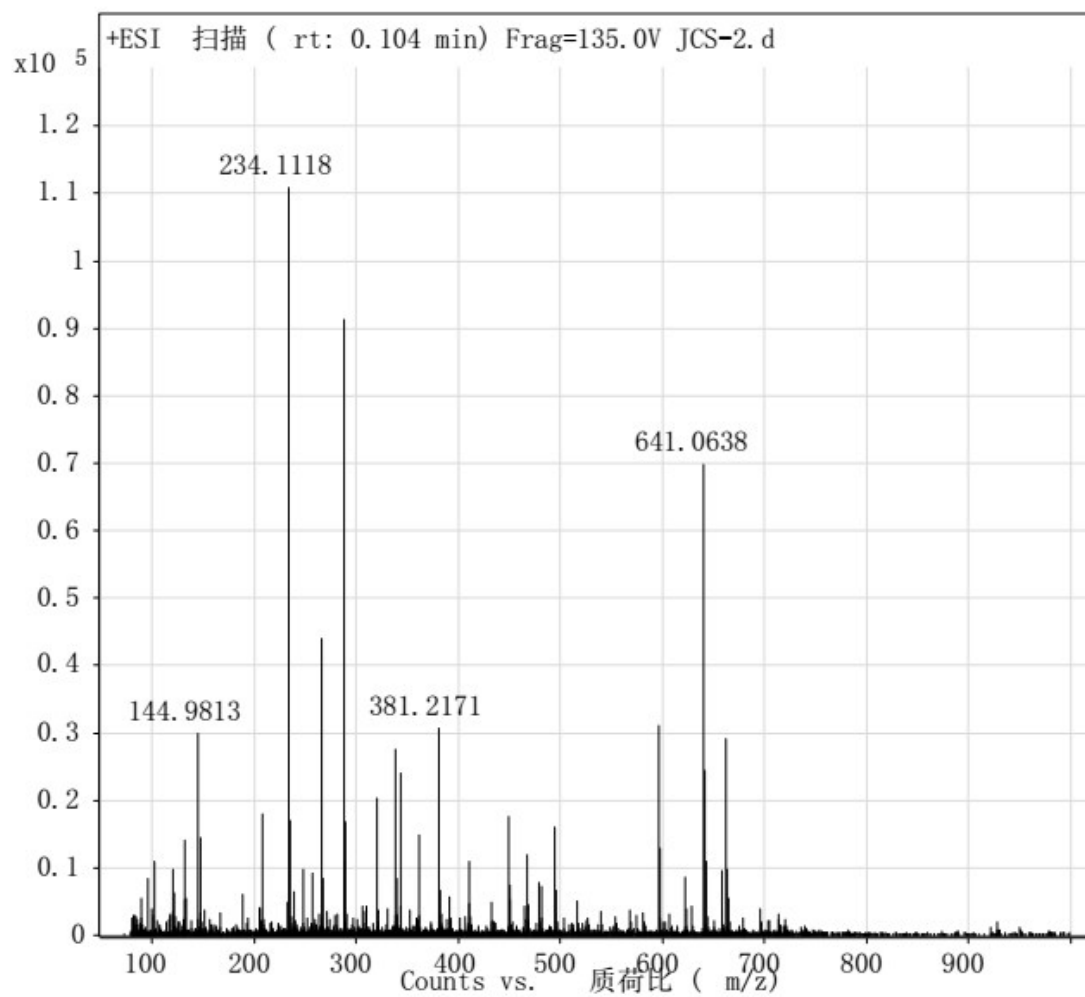

**Fig. S14** HRESIMS spectrum of compound **ER-G**
